# Supplementary material for: Screening for Bioactive Metabolites in Leaves, Branches, and Roots of Mansoa hirsuta: Phytochemical, Toxicological and Antioxidant Aspects
Source: MDPI journal article supplement (doi:10.3390/biophysica3030028), 2023-06-28
Supplement: s1 [file s1]

# Supplementary Material

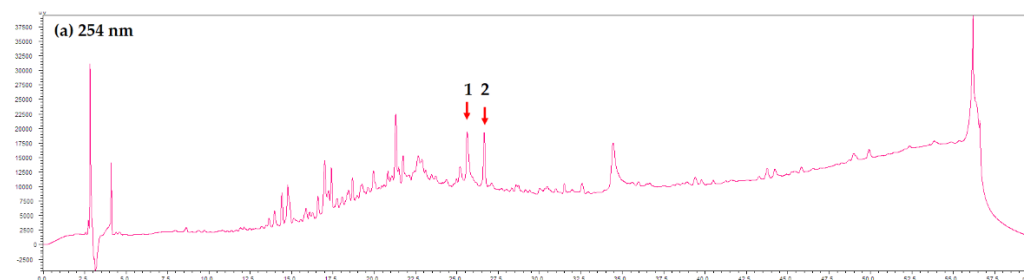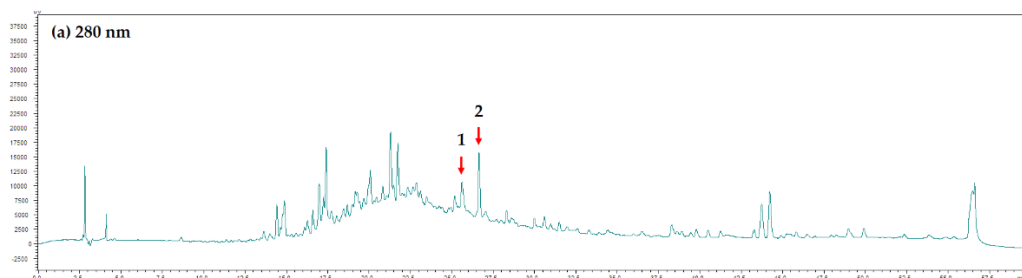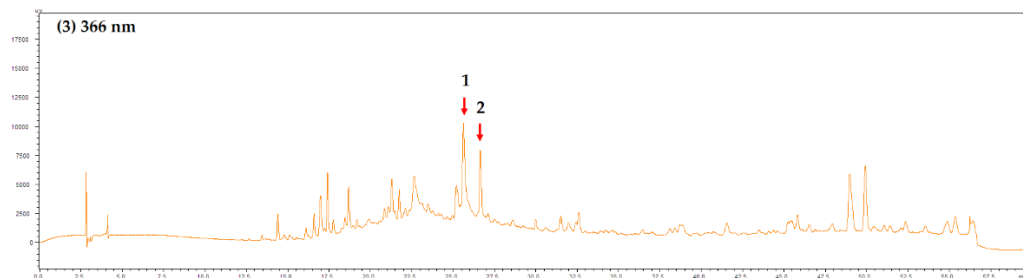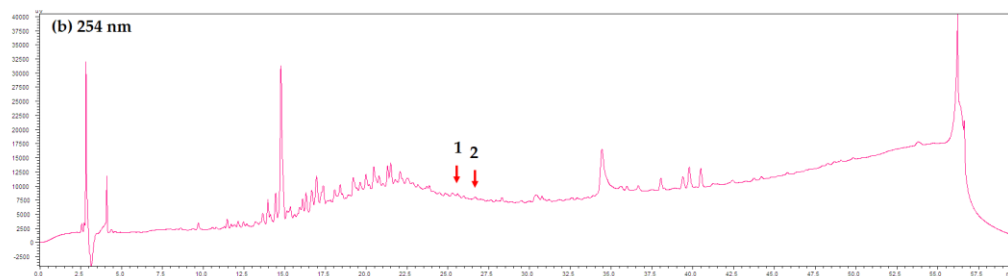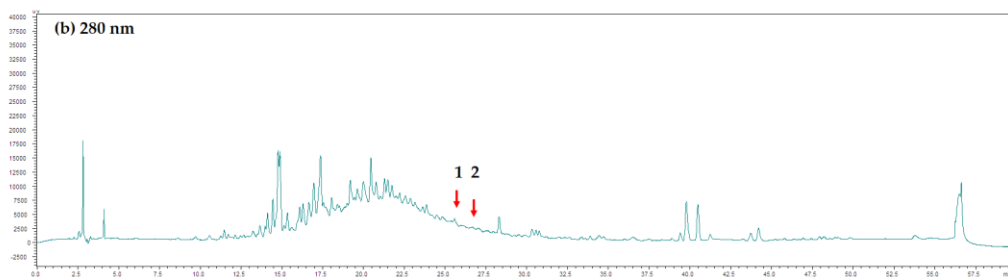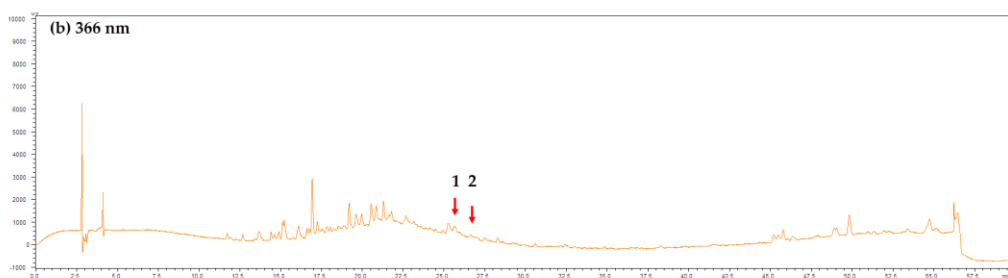

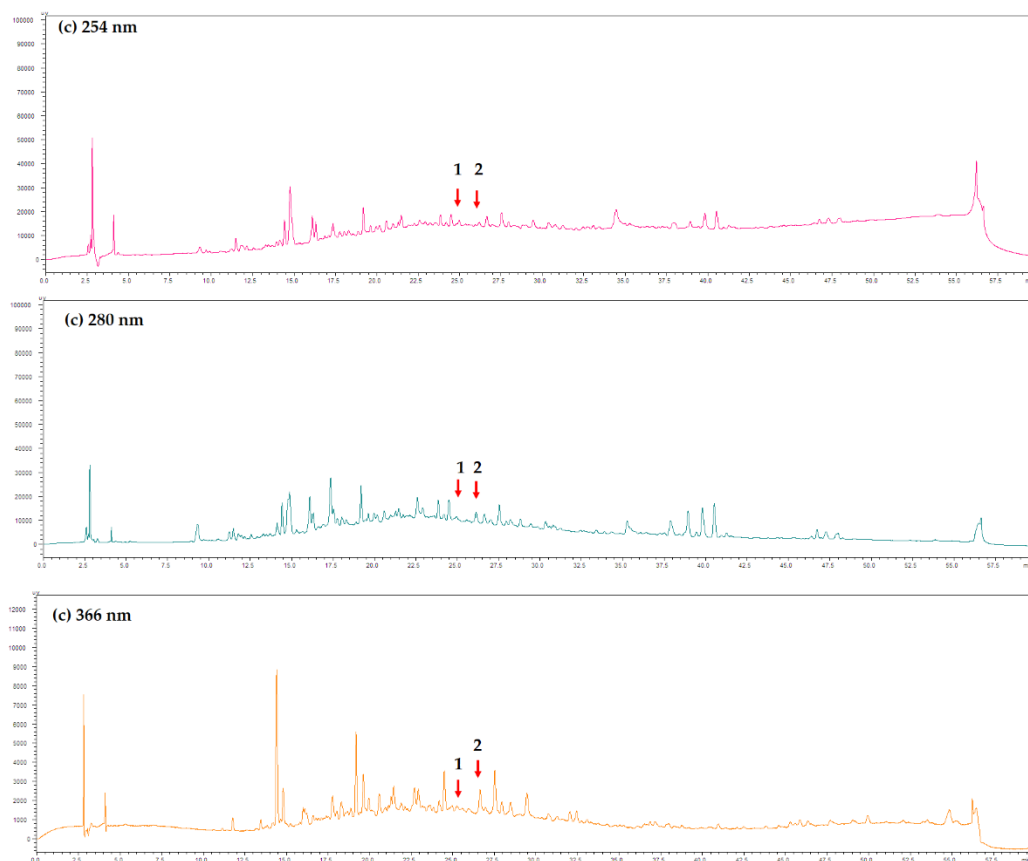

**Figure S1** Analytical chromatograms of *M. hirsuta* chloroform fractions by HPLC-PDA, detection at wavelengths 254 nm, 280 nm and 366 nm, <sup>a</sup> FCFMh, <sup>b</sup> FCGMh and <sup>c</sup> FCRMh, where FCFMh: Chloroform fraction of *Mansoa hirsuta* leaves; FCGMh: Chloroform fraction of *Mansoa hirsuta* branches; FCRMh: Chloroform fraction of *Mansoa hirsuta* roots. **1:** compound - isoorientin-2''-O-arabinoside; **2:** compound - phytosphingosine

1 (a)

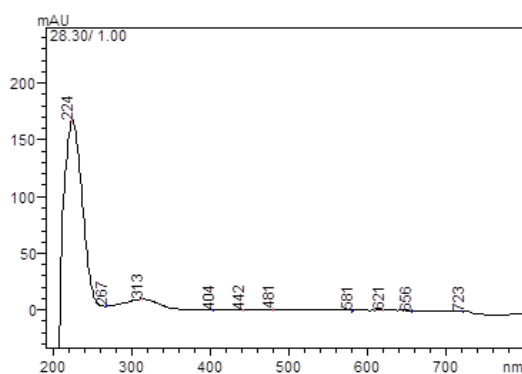

2 (a)

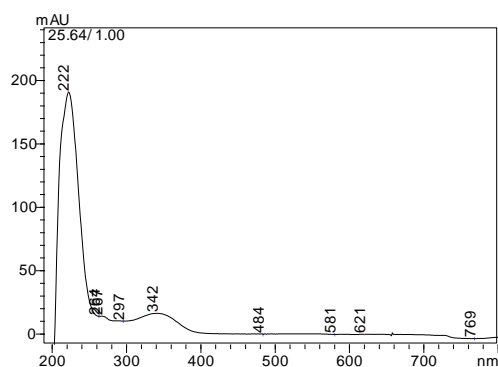

2 (b)

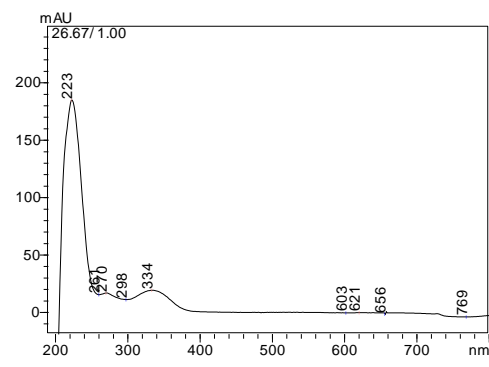

2 (c)

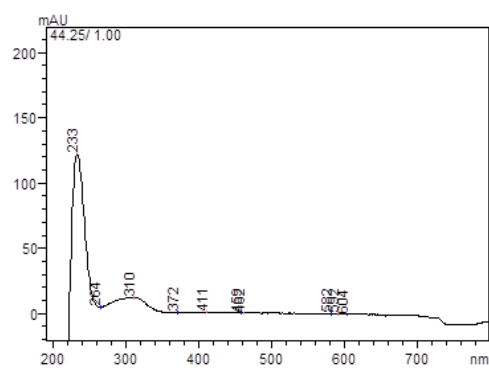

3 (a)

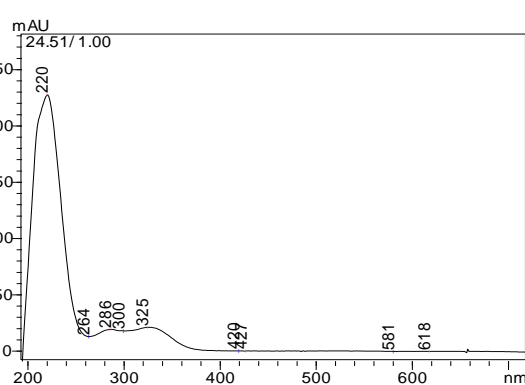

3 (b)

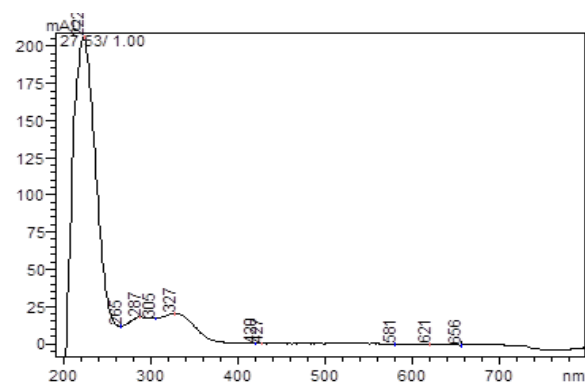

**Figure S2** UV spectra at wavelengths characteristic of chalcones in the range from 220 nm to 390 nm. 1 (a) Retention time of 28.30 min, absorption bands at 224 nm and 313 nm – FCFMh; 2 (a), 2 (b) and 2 (c) Retention time of 25.64 min, 26.67 min and 44.25 min, respectively. Absorption bands: ( $\lambda$  222 nm and 342 nm), ( $\lambda$  223 nm and 334 nm) and ( $\lambda$  223 nm and 310 nm), respectively, for FCFMh; 3 (a) and 3 (b) Retention time of 24.51 min and 27.53 min, respectively. Absorption bands: ( $\lambda$  220 nm and 325 nm) and ( $\lambda$  220 nm and 327 nm), respectively, for FCFMh.

1 (a)

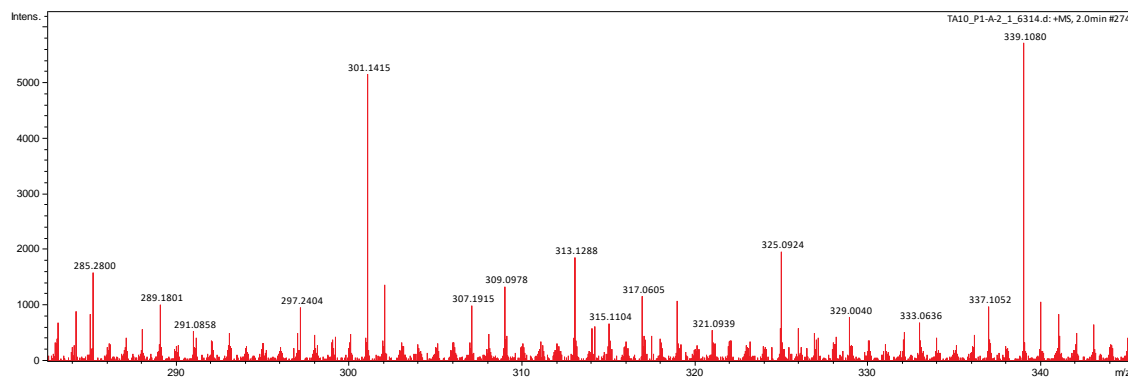

1 (b)

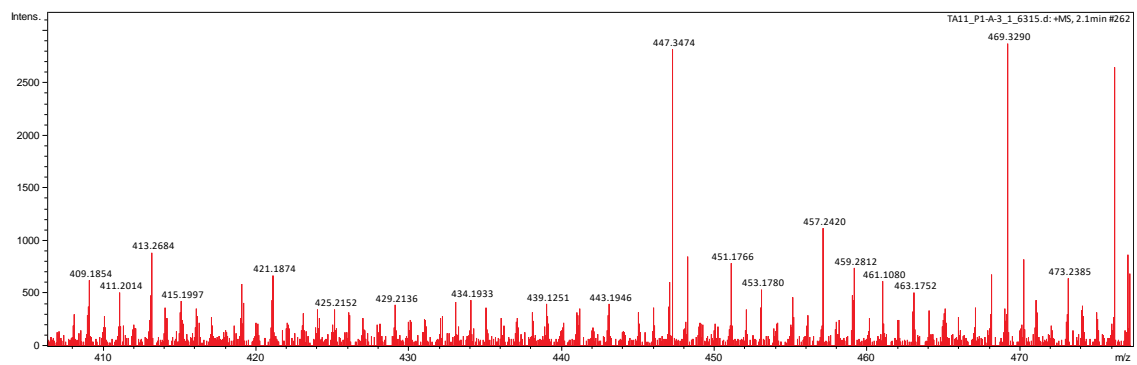

1 (c)

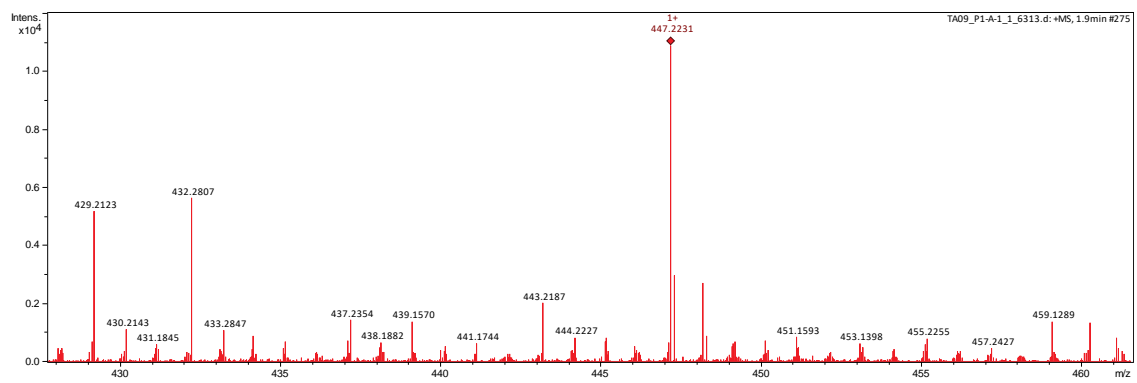

2 (a)

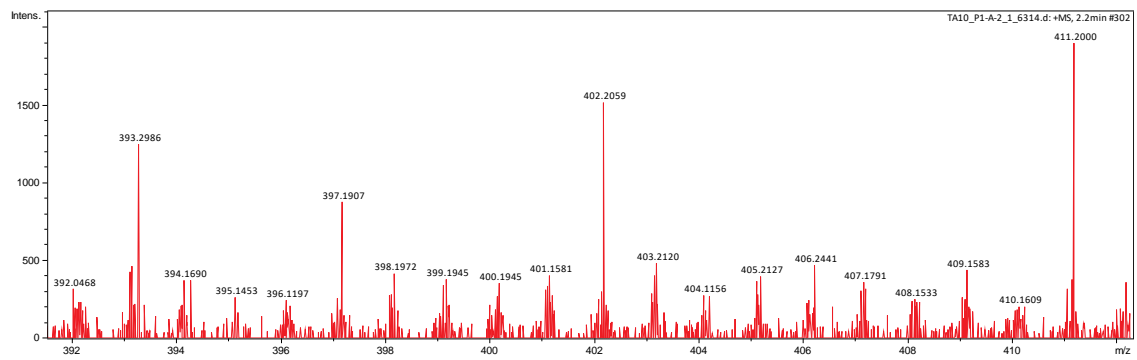

2 (b)

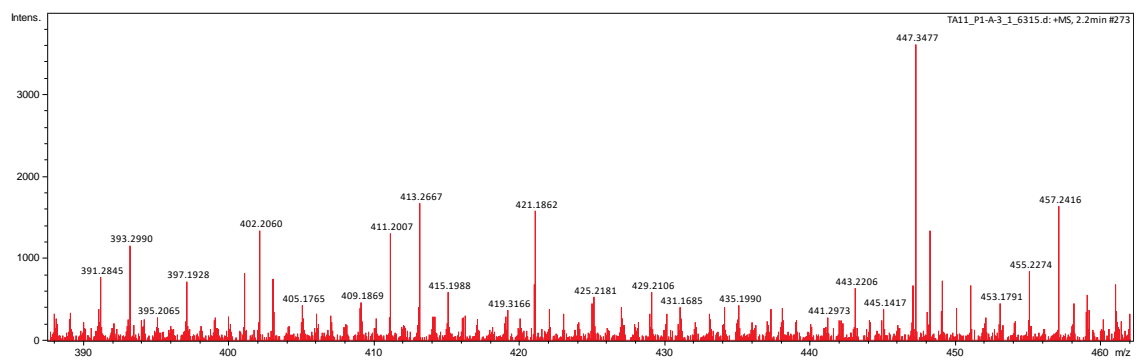

2 (c)

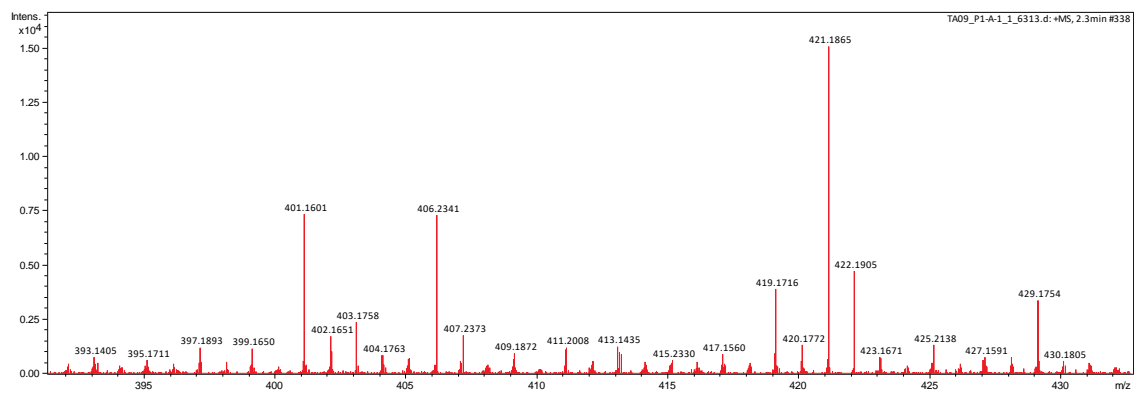

3 (a)

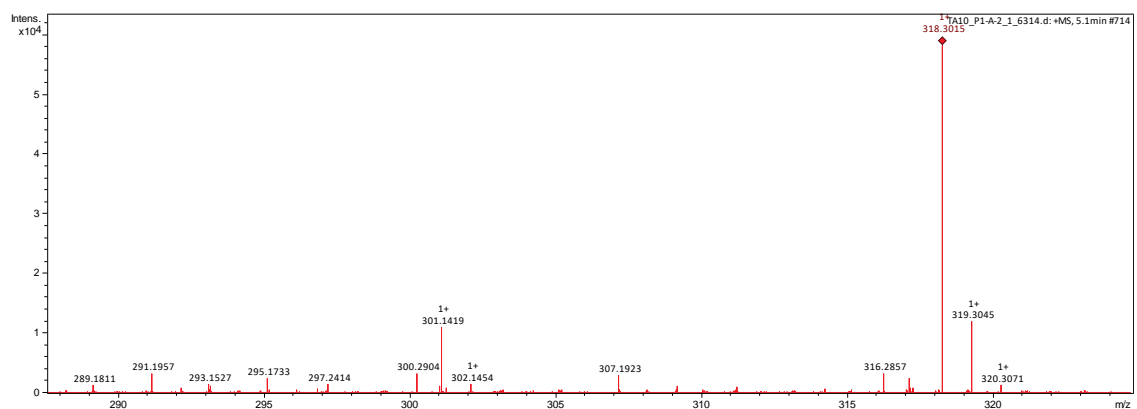

3 (b)

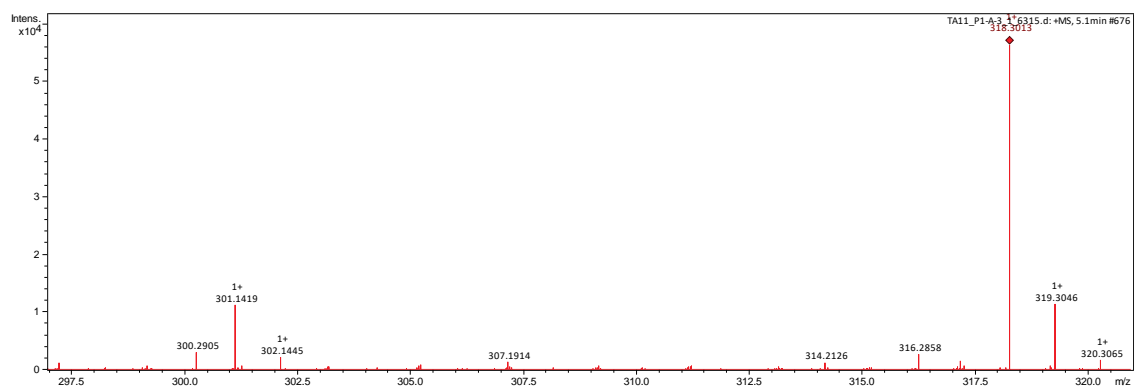

3 (c)

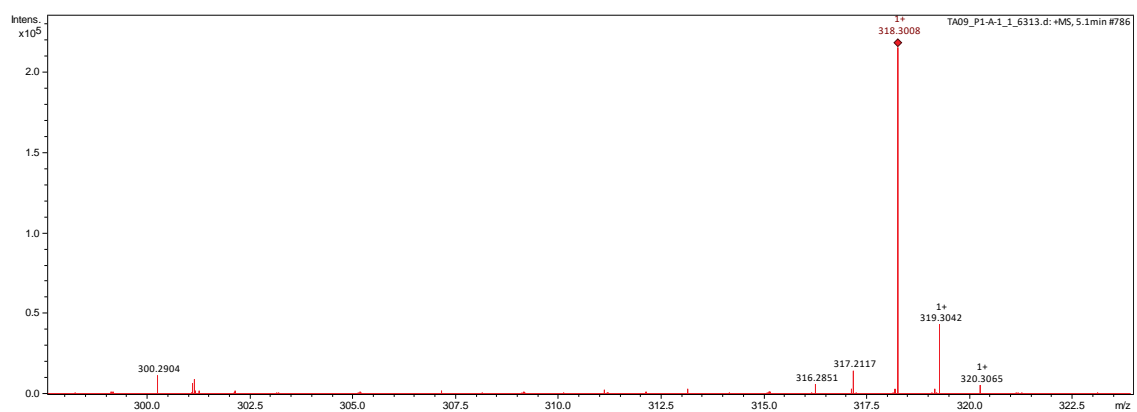

**Figure S3.** Spectra with the m/z fragments corresponding to the compounds identified in the positive ionization mode: 1 (a) FCFMh - Isoorientin-2''-O- arabinoside, 1 (b) FCGMh - Isoorientin-2''-O-arabinoside, 1 (c) FCRMh - Isoorientin-2''-O-arabinoside, 2 (a) FCFMh - oleonolic and ursolic acid, 2 (b) FCGMh - oleonolic and ursolic acid, 2 (c) FCRMh - oleonolic and ursolic acid, 3 (a) FCFMh - Phytosphingosine, 3 (b) FCGMh - Phytosphingosine, 3 (c) FCRMh - Phytosphingosine

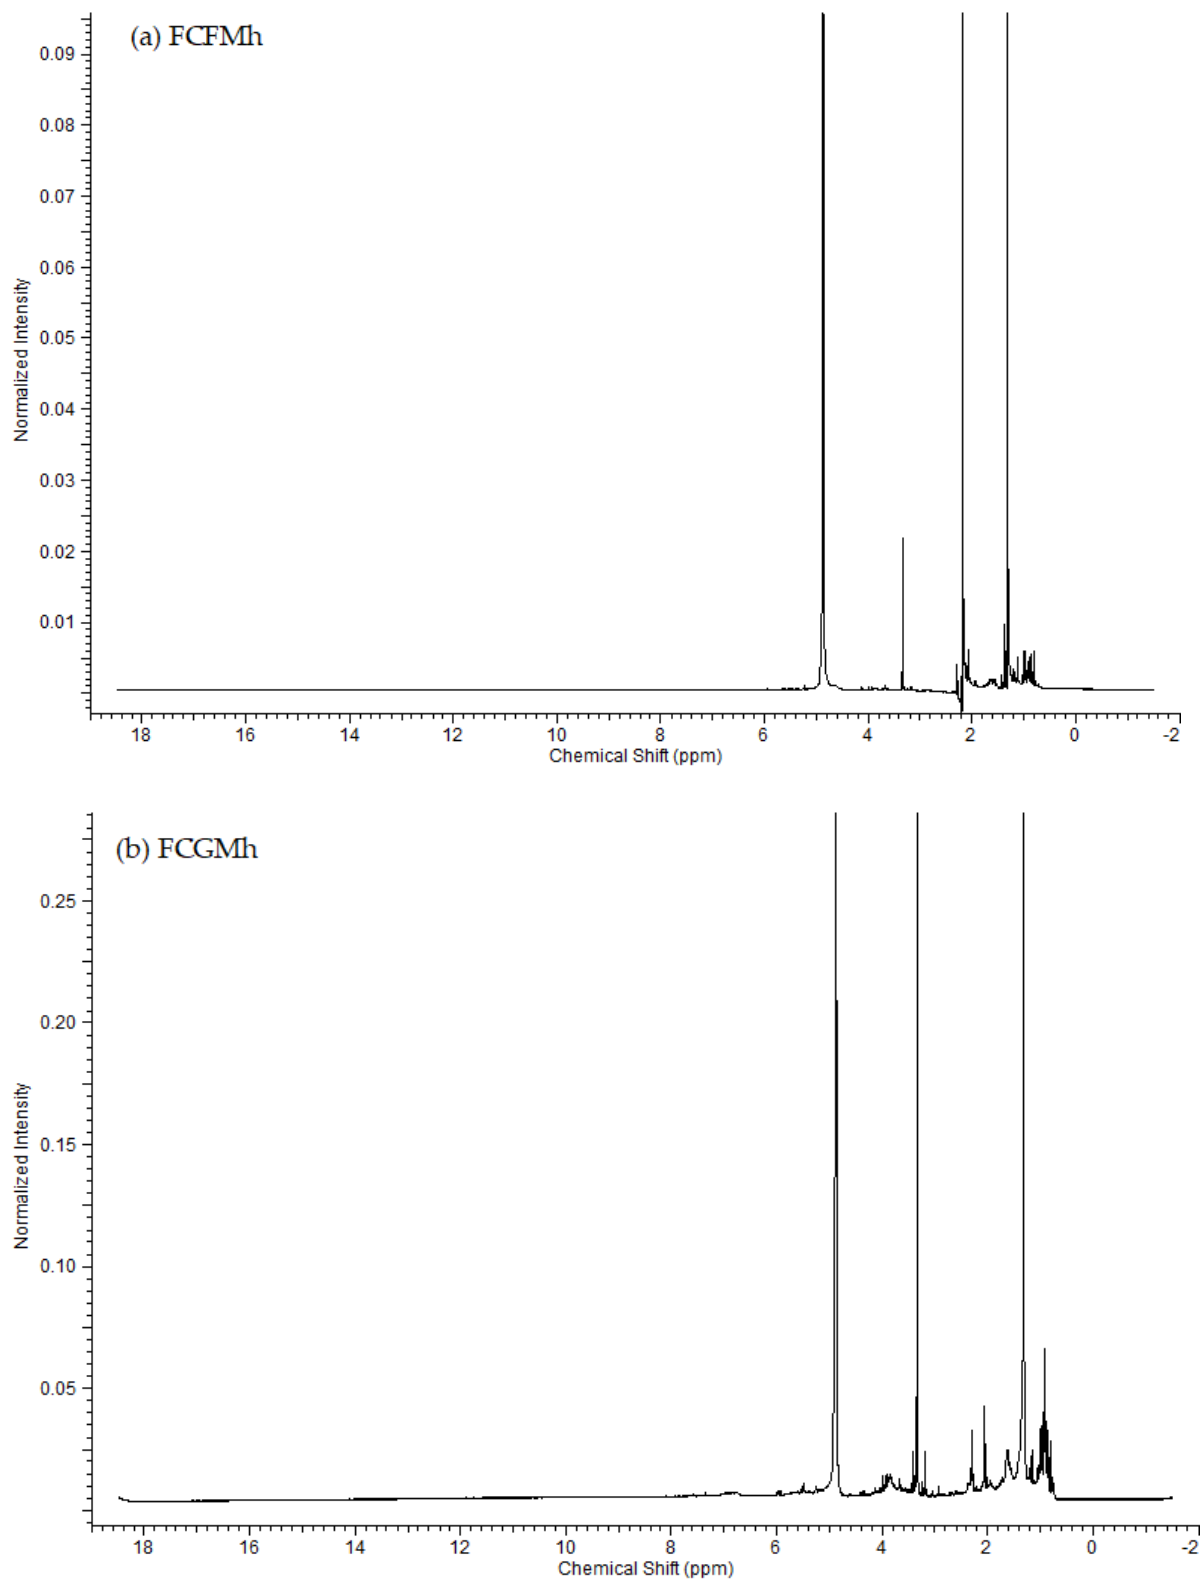

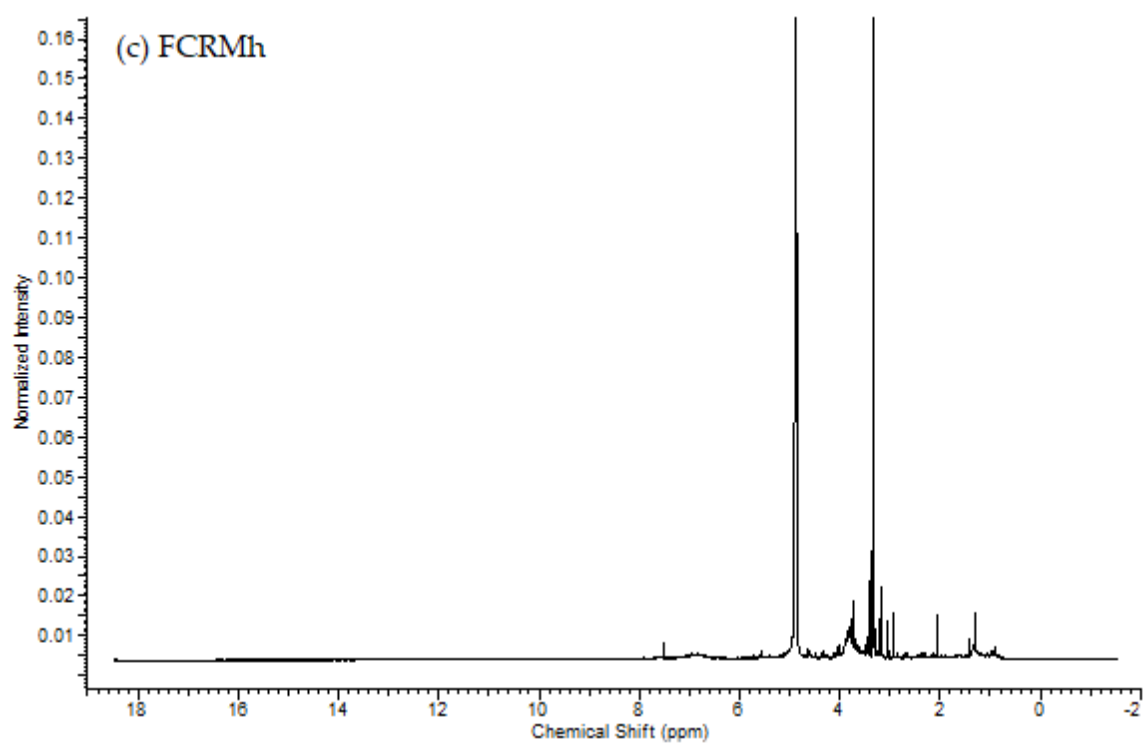

**Figure S4.**  $^1\text{H}$  NMR spectra (Methanol-D<sub>4</sub>, 600 MHz) of chloroform fractions from leaves, branches and roots of *M. hirsuta*
